1 Assessing the bioenergy potential of grassland biomass from conservation areas in England

2  
3 Katherine E. French<sup>1</sup>

4  
5 <sup>1</sup>Department of Plant and Microbial Biology, University of California Berkeley, Berkeley, CA 94720

6  
7  
8  
9  
10  
11  
12  
13 **Abstract**

14 Bioenergy may be one of the ‘ecosystem services of the future’ for grasslands managed for conservation  
15 as the concept of bio-based economies is embraced worldwide. Although the idea of producing biogas  
16 and bioethanol from lignocellulosic material is not new, there are currently few regional-level  
17 comparisons of the bioenergy potential of high-diversity grasslands that would establish whether this  
18 could be a competitive bioenergy feedstock for farmers. Comparing the chemical composition and  
19 biogas yields of biomass samples from 13 grasslands in England and 73 other bioenergy feedstocks  
20 reveals that the lignin content of biomass from grasslands managed for conservation was up to 50% less  
21 than other bioenergy crops. Grasslands managed for conservation yielded up to 160% more biogas per  
22 ton dry matter than cereals or crop waste and only slightly less than *Miscanthus*. GIS modeling of the  
23 estimated biogas yields of grasslands managed for conservation and fields currently sown with  
24 *Miscanthus* show that grasslands are larger (20.57 ha) than *Miscanthus* fields (5.95 ha) and are  
25 projected to produce up to 117% more biogas per average field. Future incorporation of high-diversity  
26 grasslands into local and nation-wide energy plans may help reduce global fossil-fuel use in the 21<sup>st</sup>  
27 century.

28  
29 Keywords: agro-environmental schemes; ecosystem services; lignocellulosic biomass; fossil fuels;  
30 biodiversity conservation

## 31 1. Introduction

32

33 Global reliance on fossil fuels has led to loss of natural ecosystems and global warming (Butt et al, 2013;

34 Kirschke et al. 2013). In an effort to reduce fossil fuel consumption, producing ethanol from first-

35 generation bioenergy crops like maize and jatropha increased in the 1980s (Openshaw 2000). However,

36 expanded cultivation of primary bioenergy crops has led to the loss of local biodiversity, destruction of

37 soil microbial communities, and increased competition between food and fuel production (Prochnow et

38 al. 2009). Primary energy crops like maize and rapeseed also produce high levels of nitrous oxide (N<sub>2</sub>O),

39 a greenhouse gas 296 times more detrimental than the carbon dioxide (CO<sub>2</sub>) released during fossil fuel

40 consumption, due to high nutrient (nitrogen) requirements (Crutzen et al. 2008). In response, over the

41 past two decades research has focused on developing a number of second and third generation

42 bioenergy crops with a lower environmental impact. These initiatives include producing biogas from

43 crop waste, creating new cultivars of specific crops with enhanced sugar or cellulose contents, and using

44 algae to produce biodiesel (Christian et al. 2008; Jones and Mayfield 2012). Generating bioenergy from

45 plants is now a cornerstone of policies to build stronger bioeconomies in the UK, EU and USA (Burns et

46 al. 2016; EC 2006; McCormick and Kautto 2013).

47

48 Producing bioenergy from grasslands may also be a viable alternative to first-generation biofuel

49 production and would promote the preservation of native biodiversity and its associated ecosystem

50 services. Globally, grasslands are increasingly converted to arable land or urban development. They are

51 one of the most threatened biomes yet receive the least conservation attention. For example,

52 temperate grasslands, savannahs and shrublands cover 45.8% of Earth's terrestrial surface yet only 4.6%

53 of this area is under active protection (Hoekstra et al. 2005). Grasslands provide food for pollinators,

54 flood control, and support ecological food webs sustaining rare plants and animals (Fletcher et al. 2011;

55 Holzschuh et al. 2011; Verdade et al. 2015). Using grasslands currently set aside for conservation for

56 bioenergy production would ensure the maintenance of these ecosystem services while also providing  
57 an economic benefit to farmers.  
58  
59 Although the idea of producing biogas and bioethanol from lignocellulosic material is not new (Adler et  
60 al. 2009; Herrman et al. 2013; Van Meerbeek et al. 2016), there are currently few regional-level  
61 comparisons of the bioenergy potential of high-diversity grasslands that would establish whether this  
62 could be a competitive bioenergy feedstock for farmers. A number of factors may inhibit the production  
63 of biogas and bioethanol from grassland biomass. For example, plants typical of grasslands (grasses,  
64 forbs and herbs) have tough cell walls composed of cellulose, hemicellulose, and lignin. Lignin tightly  
65 binds hemicellulose and cellulose together and fermentation (anaerobic digestion) is necessary to break  
66 these bonds to produce biogas and/or ethanol. Grassland biomass is often rejected as a suitable  
67 bioenergy feedstock due to its lignin content (Frigon and Giuiot 2010; Triolo et al. 2012). Indeed, a  
68 number of international initiatives now focus on breeding crops like barley with lower levels of lignin by  
69 using CRISPR/cas9 to induce targeted mutations in cinnamyl alcohol dehydrogenase (CAD), which  
70 regulate lignin biosynthesis (Kalluri et al. 2014). However, pre-treating lignocellulosic biomass can  
71 increase the biogas yields of substrates with high lignin levels. Steam explosion can separate lignin from  
72 hemicellulose and cellulose and can double biogas yields (Hendricks and Zeeman 2009). Fungi, such as  
73 *Trichoderma* spp., can also be used to break down lignin before the biomass is added to the digester  
74 increasing biogas yields by up to 400% (Muthangya et al. 2009; Wagner et al. 2013). The bacteria used  
75 as inoculum in anaerobic digesters can also be optimized to break down lignin (Sun et al. 2013). For  
76 example, *Clostridium thermocellum*, *Comamonas testosteroni*, and *Pseudonocardia autotrophica* contain  
77 endoglucanases, exoglucanases, xylanases, and lignolytic enzymes highly effective in degrading plant cell  
78 walls (Himmel et al. 2007; Liao et al. 2016).

79

80 Despite increased interest as grasslands as a source of bioenergy, the bioenergy output of grasslands  
81 compared to other current bioenergy feedstocks is unclear. Here, I estimate the biogas output of three  
82 different types of grasslands common to Europe: (1) unimproved grasslands, which are high in  
83 biodiversity and offer multiple ecosystem services; (2) restored grasslands, which are former arable  
84 fields; and (3) improved grasslands sown with ryegrass (*Lolium perenne* L.), clover (*Trifolium pratense* L.,  
85 *Trifolium repens* L.) and lucerne (*Medicago sativa* L.). I specifically chose to assess biogas yield instead  
86 of ethanol yield because lignocellulosic feedstocks are more suitable for biogas production. In addition,  
87 anaerobic digesters in England (and more broadly, Europe) currently use lignocellulosic materials (e.g.  
88 crop waste) to produce biogas and electricity, not ethanol. I then compared the lignocellulosic  
89 composition and biogas outputs of these grasslands to 73 other bioenergy feedstocks. Using  
90 Oxfordshire, England as a case study, I then conducted a regional analysis of the potential biogas yield of  
91 grasslands managed for conservation versus fields sown with Miscanthus. I specifically chose to  
92 estimate the potential biogas yields of a single county due to previous objections that the potential land  
93 available for bioenergy production is overestimated at the national level (Russelle et al. 2007; Steubing  
94 et al. 2010). The present study focuses primarily on the suitability of biomass from grasslands managed  
95 for conservation as a bioenergy feedstock and the potential energy yields of these agricultural  
96 landscapes. Excluded from this analysis are the economic costs and benefits of bioenergy production  
97 from grasslands.  
98

## 99 2. Methods

100

### 101 2.1 Study area

102

103 The county of Oxfordshire is located in south-east England. The county has a maritime temperate  
104 climate with an annual rainfall of between 570 -750 mm depending on elevation (Killick *et al.* 1998). The  
105 primary crops are wheat (*Triticum aestivum* L.), barley (*Hordeum vulgare* L.), and rapeseed (*Brassica*  
106 *napus* L.). Miscanthus and Short Rotation Coppice are currently grown as bioenergy crops on a small  
107 scale. There are currently six anaerobic digesters in the county that process lignocellulosic biomass (crop  
108 waste, cereals, maize, and ryegrass) (The National Non-Food Crops Center (NNFCC) database,  
109 <http://www.nnfcc.co.uk/>) but none use grassland biomass as a feedstock.

110

### 111 2.2 Site selection and vegetation surveys

112

113 In July 2015, biomass samples were collected from 13 grasslands. These sites consisted of seven  
114 unimproved meadows, four restored meadows, and two improved grasslands. All samples were  
115 collected from working farms in Oxfordshire, England to reflect real agricultural conditions. This is  
116 particularly important, as most studies on bioenergy output from grasslands are based on biomass  
117 samples from experimental plots which may not reflect the species composition of real fields. To  
118 determine the species-composition and richness for each field vegetation surveys were conducted at  
119 each site. To ensure comparability between fields, I designated a 10 m x 10 m area for survey and forage  
120 collection at each site. These sample areas were not selected beforehand because the area sampled was  
121 based on the farmer's decision on the day of the site visit. The presence of grazing livestock, fertilizer  
122 application, specific conservation regulations, and farmer interest in the forage quality of specific fields

123 influenced farmer choice. To determine species composition, five 1m<sup>2</sup> quadrats were randomly placed  
124 within each field and the species present in each quadrat were recorded. Abundance was determined as  
125 the number of quadrats each species occurred in. Plants were identified using Fitter et al. (1984).

126

### 127 *2.3 Biomass sample collection and analysis*

128

129 At each site, biomass samples of ca. 150 grams were collected. Biomass sample collection protocols  
130 were adapted from guidelines used for hay-bale sampling developed by the National Forage Testing  
131 Association (NFTA) (<http://foragetesting.org/>) and consultation with forage experts from the Agri-Food  
132 and Biosciences Institute (AFBI) (Belfast, Northern Ireland) (<http://www.afbini.gov.uk/>). To ensure  
133 comparability among samples, grasslands were sampled at the same time of day (10 am). While walking  
134 in a zig-zag pattern in each field, handfuls of grass were cut ca. 10 cm from the ground with shears at ca.  
135 20 different locations. To ensure an accurate representation of the vegetation composition of the field,  
136 all plant species collected in the process of sampling were included in the sample. During collection,  
137 grass was placed in a canvas bag to limit changes in forage sugar composition due to increased heat and  
138 bacterial activity. Samples were kept at room temperature. Samples were oven dried at 60°C and milled  
139 on the same day of collection. Wet chemistry was used to establish Dry Matter (DM) content, sugar,  
140 fiber, protein, and lignin content of each sample. Sugar content (water soluble carbohydrate, WSC) was  
141 determined by modifying the method created by McDonald and Henderson (1964). Crude protein (CP)  
142 was determined using the Kjeldahl method (Association of Official Analytical Chemists 1990). Neutral  
143 detergent fiber (NDF) and acid detergent fiber (ADF) were determined using Refluxing method (Van  
144 Soest et al. 1991). All sample analyses were performed at the Agri-Food and Biosciences Institute  
145 agricultural research center in Hillsborough, England.

146

147 2.4 Collection of comparative data on bioenergy feedstocks

148

149 To compare the lignocellulosic composition of species-rich grass to other bioenergy feedstocks, data on  
 150 73 contemporary bioenergy crops from two databases, *Phyllis2* (<https://www.ecn.nl/phyllis2/>) and  
 151 *Feedipedia* (<http://www.feedipedia.org/>), were collected (**Table 1**). Only samples with data on cellulose,  
 152 hemicellulose and lignin content were included in the analysis. An attempt was made to include at least  
 153 three examples of each feedstock but this was not possible for all crops. The biogas yield and methane  
 154 content of the biomass samples from Oxfordshire were compared to a subset of these bioenergy  
 155 feedstocks (cereals, crop wastes, grass, *Miscanthus*, legumes, rapeseed, and switchgrass). The bioenergy  
 156 yield for five feedstocks (newsprint, agave, bamboo, hemp, and kenaf) was not calculated due to  
 157 absence of dry matter content (DM) data.

158

159 **Table 1 List of contemporary bioenergy feedstocks that were compared to biomass from species-rich grasslands.**  
 160 The lignocellulosic composition of biomass from species-rich grasslands was compared to all feeds listed in Table 1.  
 161 The biogas yield of biomass from species-rich grasslands was only compared to those feedstocks marked with a \*.  
 162

| Feedstock              | No.       | Species (if applicable)                                                                                                                                                                                                                                                                              |
|------------------------|-----------|------------------------------------------------------------------------------------------------------------------------------------------------------------------------------------------------------------------------------------------------------------------------------------------------------|
| <b>Agave</b>           | 1         | <i>Agave</i> L.                                                                                                                                                                                                                                                                                      |
| <b>Bamboo</b>          | 1         | <i>Bambuseae</i> sp. Kunth ex Dumort                                                                                                                                                                                                                                                                 |
| <b>*Cereals</b>        | 12        | wheat ( <i>Triticum aestivum</i> L.), barley ( <i>Hordeum vulgare</i> L.), oats ( <i>Avena sativa</i> L.), and maize ( <i>Zea mays</i> L.)                                                                                                                                                           |
| <b>*Crop waste</b>     | 8         | corn stover (maize stalks) and straw from wheat, barley and oats                                                                                                                                                                                                                                     |
| <b>*Grass</b>          | 15        | Timothy ( <i>Phleum pratense</i> L.), orchard grass ( <i>Dactylis glomerata</i> L.), Bromegrass ( <i>Bromus</i> sp. Scop), Big Bluestem ( <i>Andropogon gerardi</i> Vitman), Tall Fescue ( <i>Festuca arundinacea</i> Schreb.), Reed Canary Grass ( <i>Phalaris arundinacea</i> L.), and verge grass |
| <b>*Hemp</b>           | 2         | <i>Cannabis sativa</i> L.                                                                                                                                                                                                                                                                            |
| <b>*Kenaf</b>          | 2         | <i>Hibiscus cannabinus</i> L.                                                                                                                                                                                                                                                                        |
| <b>*Legumes</b>        | 12        | lucerne ( <i>Medicago sativum</i> L.), clover ( <i>Trifolium</i> spp), and soybean ( <i>Glycine max</i> (L.) Merr.)                                                                                                                                                                                  |
| <b>*Miscanthus</b>     | 3         | <i>Miscanthus x giganteus</i> Keng                                                                                                                                                                                                                                                                   |
| <b>Newsprint/Paper</b> | 6         | recycled paper, newsprint, and domestic paper waste                                                                                                                                                                                                                                                  |
| <b>*Rapeseed</b>       | 3         | <i>Brassica napus</i> L.                                                                                                                                                                                                                                                                             |
| <b>*Sisal</b>          | 2         | <i>Agave sisalana</i> Perrine                                                                                                                                                                                                                                                                        |
| <b>Sugarcane</b>       | 2         | <i>Saccharum</i> sp. L.                                                                                                                                                                                                                                                                              |
| <b>*Switchgrass</b>    | 4         | <i>Panicum virgatum</i> L                                                                                                                                                                                                                                                                            |
| <b>Total</b>           | <b>73</b> |                                                                                                                                                                                                                                                                                                      |

163  
164

## 165 *2.5 Estimated bioenergy output*

166

167 Biogas yield was calculated based on the chemical composition of each substrate using the Buswell

168 formula  $(C_c H_h O_o N_n S_s + \{(4c - h - 2o + 3n + 2s)/4\} H_2O \rightarrow \{(4c - h + 2o + 3n + 2s)/8\}$

169  $CO_2 + \{(4c + h - 2o - 3n - 2s)/8\} CH_4 + nNH_3 + sH_2S)$  (Symons and Buswell 1933; Teghammer 2013; Triolo

170 et al. 2012). Cellulose, hemicellulose, and lignin content were used to calculate the potential bioenergy

171 yield of each feedstock because these are the main substrates converted to biogas in anaerobic

172 digestion. Protein and fat/lipid content was not available for all samples so they were excluded from the

173 analysis. The protein and fats/lipids are usually low for the lignocellulosic materials analyzed in this

174 study so this should make little difference to the total bioenergy yield. As there are three chemical

175 formulas for lignin ( $C_9H_{10}O_2$ ,  $C_{10}H_{12}O_3$ , and  $C_{11}H_{14}O_4$ ), the molar mass, carbon yield and methane yield

176 were calculated for each and the average of the three was used. To calculate the carbon and methane

177 yields, I used  $V = nRT/p$ , where  $n$  = amount of substance (mol),  $R$  = gas constant ( $L atm K^{-1} mol^{-1}$ ),  $T$  =

178 absolute temperature (K), and  $p$  = absolute pressure of the gas (atm). In this analysis,  $R$  was set at

179  $0.08205747 L atm K^{-1} mol^{-1}$ ,  $T$  was set at 273.15 K, and  $p$  was set at 1 atm according to previously

180 established protocols for estimating biogas yield (Teghammer 2013; Richards et al. 2001).

181 **Supplementary Table 1** shows the biogas yield from cellulose, hemicellulose and lignin based on the

182 Buswell Formula. The biogas yield of lignin and hemicellulose is similar to fat/lipid ( $C_{57}H_{104}O_6$ ) (1.4

183 Normal Meter Cubed ( $Nm^3$ )/kg) although the methane concentration of fats/lipids is much higher (70%).

184 The biogas yields of protein ( $C_5H_7O_2N$ ) (1.0  $Nm^3$ /kg) and carbohydrate ( $C_6H_{12}O_6$ ) (0.8  $Nm^3$ /kg) are similar

185 to cellulose but lower than hemicellulose and lignin. However, the methane outputs of protein,

186 carbohydrate, cellulose, hemicellulose and lignin are similar (~50%).

187



188 To calculate the biogas output, I calculated the biogas yields of cellulose, hemicellulose and lignin for 1  
189 ton dry matter of each sample based on previous established protocols (see Teghammer 2013; Rittmann  
190 et al. 2001). Briefly, this can be summarized in the following equation:

191  
192 Biogas yield of substrate  $Y = 1000 \text{ kg (wet weight)} \times \% \text{ DM} \times 0.9 (\% \text{ VS of TS}) \times \% Y \times Y_{\text{Nm}^3 \text{ biogas/t Y}}$  (1)

193  
194 The DM of each sample is used as the total solids (TS) of the sample. To allow for up to 10% of the  
195 substrate to be consumed by bacteria during the anaerobic digestion process, the percent volatile solids  
196 (VS) of the total solids was set at 0.9. In the equation,  $Y$  refers to the % DM of cellulose, hemicellulose  
197 and lignin and  $Y_{\text{Nm}^3 \text{ biogas/t Y}}$  refers to the biogas yield of each compound. This is 0.83 for cellulose, 1.2 for  
198 hemicellulose, and 1.25 for lignin respectively. The total methane yield ( $\text{Nm}^3/\text{t}$ ) of each sample was  
199 calculated based on the methane yields for cellulose (0.50), hemicellulose (0.54) and lignin (0.46). To  
200 calculate methane concentrations, I divided total methane content by the total biogas content.

201  
202 *2.6 Comparison of grassland and bioenergy crop area and yield*

203  
204 To compare the area covered by grasslands managed for conservation and bioenergy crops, data on the  
205 total area of SSSIs, grasslands under agro-environmental schemes, and fields sown with Miscanthus and  
206 Short Rotation Coppice in Oxfordshire was obtained from Natural England ([http://www.geostore.com/  
207 environment-agency/WebStore?xml=environment-agency/xml/ogcDataDownload.xml](http://www.geostore.com/environment-agency/WebStore?xml=environment-agency/xml/ogcDataDownload.xml)). This data is  
208 public sector information licensed under the Open Government License v1.0. All maps were created  
209 using ArcGIS® software by Esri. All records were screened to remove duplicates (e.g. fields associated  
210 with more than one scheme) which would inflate actual estimates of grassland coverage. The potential  
211 yield of grassland biomass was estimated at 8-10 tons dry matter (tDM) per ha based on previous

212 estimates of average grassland biomass yields in the UK and northern Europe (Amon et al. 2006; Rösch  
213 et al. 2009; Seppälä et al. 2009).<sup>1</sup> The potential biomass yield of Miscanthus was estimated at 10-14 t/ha  
214 based on previous research by the Biomass Energy Center and the UK Forestry Commission (Biomass  
215 Energy Center 2008). The average yield per ha for grasslands managed under agro-environmental  
216 schemes was based on the lowest average biomass yield for grasslands (8 t/ha) and the average biogas  
217 yield of species-rich grasslands estimated in section 3.3. The biogas yield per ha for Miscanthus was  
218 based on the lowest average biomass yield for Miscanthus (10t/ha) and the average biogas yield of  
219 Miscanthus estimated in section 3.3. These predicted yields are based on actual field sizes (ha). These  
220 estimates are used for heuristic purposes and actual biomass yields per hectare may vary from field to  
221 field and from year to year given variation in species composition (and in the case of Miscanthus,  
222 genotype) and annual rainfall (Clifton-Brown et al. 2001).

223

## 224 2.7 Statistical Analysis

225

226 I used one-way analysis of variance (ANOVA) to determine whether there were any statistically  
227 significant differences in lignin, hemicellulose, and cellulose contents of the forage samples from  
228 Oxfordshire. To determine which species were associated high levels of lignin, hemicellulose and  
229 cellulose content, I used indirect gradient analysis using Redundancy Analysis (RDA) followed by a

---

<sup>1</sup> Previous studies report yields from semi-natural grasslands ranging from ca. 3-25 t/ha (DeHaan et al. 2009; Seppälä et al. 2009; Tilman et al. 2006). For example, the yield of semi-natural grassland in the American prairies is 3.7 t/ha while the yield of *Phragmites australis* dominated wetlands in Sweden is 10 t/ha (Lin 2012). The same is true for Miscanthus, with biomass yields ranging from 8-27 t/ha (Bauen et al. 2010; Christian et al. 2008; Himken et al. 1997; Jørgensen 1997; Kahle et al. 2001). Given the wide variation in biomass yields for grasslands and Miscanthus, I used the more conservative yield estimates for both crops based on UK and European sources.

230 Monte Carlo permutation test with 499 permutations on log-transformed data. Based on this data, I  
231 created General Additive Models (GAMs) for cellulose, hemicellulose, and lignin to determine which  
232 species were associated with increased yields of each material. Only species with a response variable of  
233  $P < 0.05$  were included. To determine the relationship between vegetation species-richness and  
234 bioenergy yield, correlation analysis (Pearson's Correlation Coefficient) was used followed by a  $t$ -test to  
235 establish significance of the  $r$  values (Crawley 2011). The same test was performed to determine  
236 whether cellulose, hemicellulose and lignin were correlated with biogas yield. To compare the  
237 lignocellulosic composition of species-rich grass and other bioenergy feedstocks, I used correspondence  
238 analysis (CA) on log-transformed data. To determine whether there were any statistically significant  
239 differences in lignin, hemicellulose, cellulose content, and bioenergy yield of species-rich grasslands and  
240 other bioenergy crops, I used ANOVA. Correlation analysis and ANOVA were performed in R version  
241 3.2.2 ("Fire Safety") and RDA and CA was performed in Canoco (version 4.5, Lepš and Šmilauer 2003).

242

### 243 **3. Results**

244

#### 245 *3.1 Lignocellulosic composition and biogas yield of grassland biomass*

246

247 Cellulose ( $F_{2,10} = 0.333$ ,  $P = 0.725$ ) and lignin ( $F_{2,10} = 2.408$ ,  $P = 0.14$ ) content did not vary significantly  
248 among the three grassland types (**Table 2; Supplementary Materials Table 2**). However, there was a  
249 marginally significant difference in hemicellulose content among grassland types ( $F_{2,10} = 3.775$ ,  $P =$   
250  $0.06$ ). Unimproved grasslands had the highest average cellulose content while restored grasslands had  
251 the highest hemicellulose content. Biogas yields varied significantly among the three grassland types ( $F_{2,10} = 6.243$ ,  $P = 0.017$ ). Restored grasslands had the highest average biogas yield followed by unimproved

253 grasslands, although there was no significant difference between the two ( $t = 0.699$ ,  $P = 0.50$ ). The  
 254 average biogas yield of improved grasslands was 30% lower than that of unimproved grasslands.

255 **Table 2 Comparison of the cellulose, hemicellulose, lignin and biogas yields of unimproved, restored and**  
 256 **improved grasslands.** Data in the table shows the mean  $\pm$  one standard error.

257

|                      | Cellulose<br>(% DM) | Hemicellulose<br>(% DM) | Lignin<br>(% DM) | Biogas Yield<br>(Nm <sup>3</sup> / ton) |
|----------------------|---------------------|-------------------------|------------------|-----------------------------------------|
| Unimproved Grassland | 24.1 $\pm$ 2.2      | 22.9 $\pm$ 1.7          | 10.3 $\pm$ 2.2   | 625.1 $\pm$ 28.3                        |
| Restored Grassland   | 22.1 $\pm$ 3.8      | 24.7 $\pm$ 2.9          | 12.5 $\pm$ 3.7   | 657.9 $\pm$ 46.9                        |
| Improved Grassland   | 26.4 $\pm$ 2.3      | 14 $\pm$ 3.7            | 1.3 $\pm$ 4.8    | 437.5 $\pm$ 60.1                        |

258

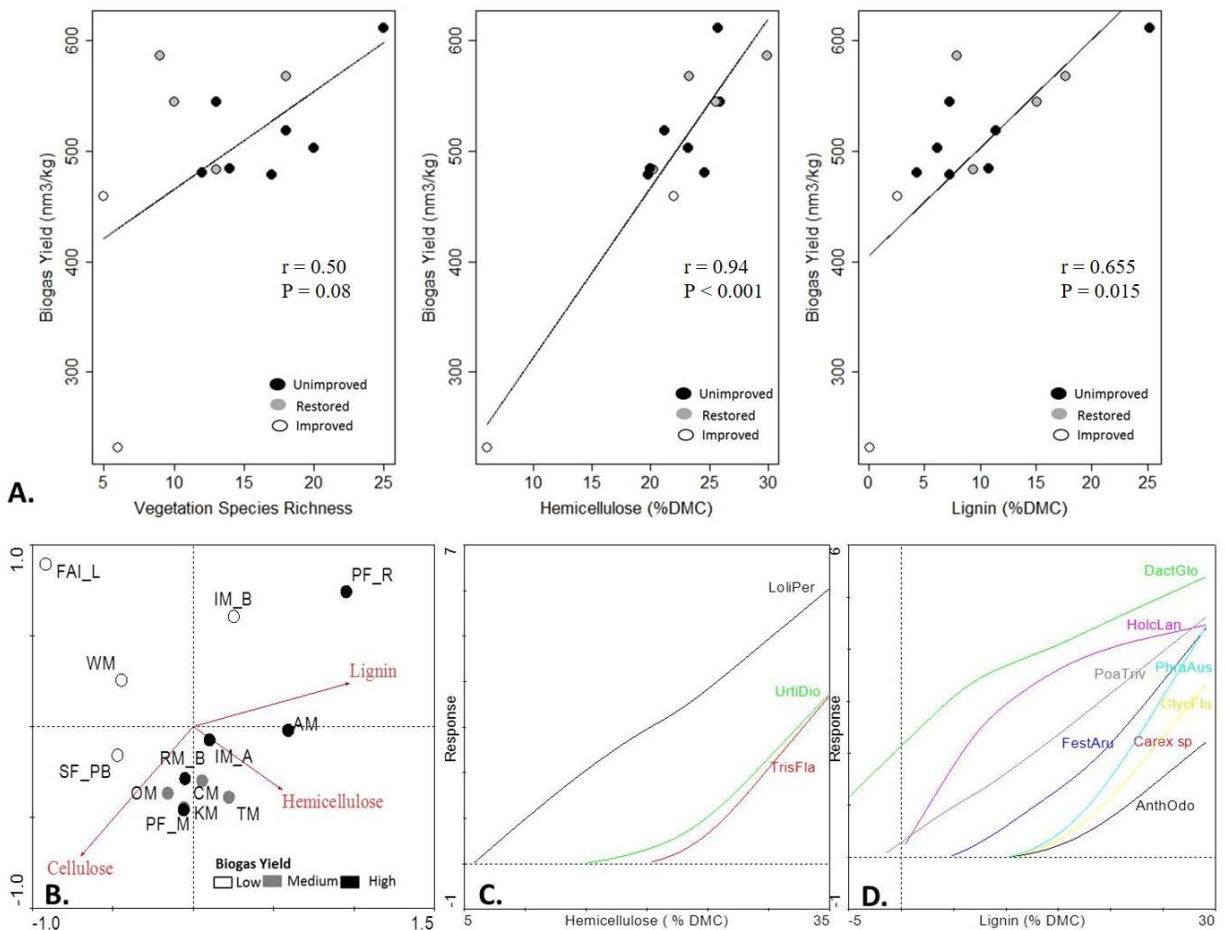

259  
 260 **Figure 1 Effect of vegetation species-richness and composition on estimated grassland biogas yields.** A.  
 261 Correlation analysis showing the relationship between species-richness, hemicellulose and lignin content and  
 262 biogas yield. B. RDA analysis showing lignocellulosic composition of grass samples from Oxfordshire. Samples are  
 263 coded based on biogas yield (high, medium, low). RDA explains 45% of the variation in species among samples and  
 264 100% of the correlation between species and the lignocellulosic components ( $F = 1.957$ ,  $P = 0.026$ ). C. and D.  
 265 Generalized Additive Models (GAMs) showing the association of particular species with hemicellulose and lignin.  
 266 Species are labeled by the first four letters of the genus and first three letters of the species. Only species with  $P <$   
 267 0.05 were included in each model.

268

### 269 3.2 Effect of vegetation species richness on lignocellulosic composition and biogas yield

270

271 Vegetation species-richness showed a strong positive correlation with lignin content ( $r = 0.71$ ,  $t = 3.30$ ,  
272  $df = 11$ ,  $P = 0.008$ ) and was not significantly correlated with either hemicellulose content ( $r = 0.29$ ,  $t =$   
273  $0.99$ ,  $df = 11$ ,  $P = 0.34$ ) or cellulose content ( $r = 0.46$ ,  $t = -1.73$ ,  $df = 11$ ,  $P = 0.11$ ). There was a marginally  
274 significant positive correlation between vegetation species and biogas yield ( $r = 0.50$ ,  $t = 1.92$ ,  $df = 11$ ,  $P =$   
275  $0.08$ ) (**Figure 1A**). Hemicellulose ( $r = 0.94$ ,  $t = 9.46$ ,  $df = 11$ ,  $P < 0.001$ ) and lignin ( $r = 0.66$ ,  $t = 2.877$ ,  $df =$   
276  $11$ ,  $P = 0.01$ ) were strongly positively correlated with biogas yield. There was no correlation between  
277 biogas yield and cellulose content ( $r = -0.24$ ,  $t = -0.99$ ,  $df = 11$ ,  $P = 0.46$ ). RDA analysis showing the  
278 relationship between lignocellulosic composition and biogas yield is depicted in **Figure 1B**. To identify  
279 which plants were correlated with increase hemicellulose and lignin content, and thus, potentially  
280 greater biogas yields, GAMS were created for hemicellulose and lignin. Yellow oat grass ( $F = 6.07$ ,  $P =$   
281  $0.019$ ), nettle (*Urtica dioica* L.) ( $F = 10.72$ ,  $P = 0.003$ ) and ryegrass ( $F = 8.19$ ,  $P = 0.008$ ) were associated  
282 with increases in hemicellulose (**Figure 1C**). Increased lignin levels were associated with increased  
283 abundances of orchard grass ( $F = 6.69$ ,  $P = 0.01$ ), Yorkshire Fog (*Holcus lanatus* L.) ( $F = 9.22$ ,  $P = 0.005$ ),  
284 common reed ( $F = 33.78$ ,  $P < 0.001$ ), and Floating Sweet Grass (*Glyceria fluitans* (L.) R. Br.) ( $F = 33.78$ ,  $P <$   
285  $0.001$ ) (**Figure 1D**).

286

### 287 3.3 Comparison to other bioenergy feedstocks

288

289

290 There were significant differences in cellulose ( $F_{14, 69} = 6.642$ ,  $P < 0.001$ ), hemicellulose ( $F_{14, 69} = 6.79$ ,  $P <$   
291  $0.001$ ), and lignin ( $F_{14, 69} = 4.03$ ,  $P < 0.001$ ) content among crop types among the different feedstocks.  
292 Hemp, sisal and kenaf had the highest cellulose content. Cereals, biomass from species-rich grasslands,  
293 and legumes had the lowest cellulose content. Switchgrass, Miscanthus, and crop waste had the highest

294 average hemicellulose levels and kenaf, hemp and legumes had the lowest. Bamboo, Miscanthus, and  
 295 rapeseed had the highest average lignin levels while agave, cereals and hemp had the lowest.  
 296 Correspondence analysis indicates that the lignocellulosic composition of biomass from species-rich  
 297 grasslands is most comparable to crop waste, grass, and switchgrass (**Figure 2A**).

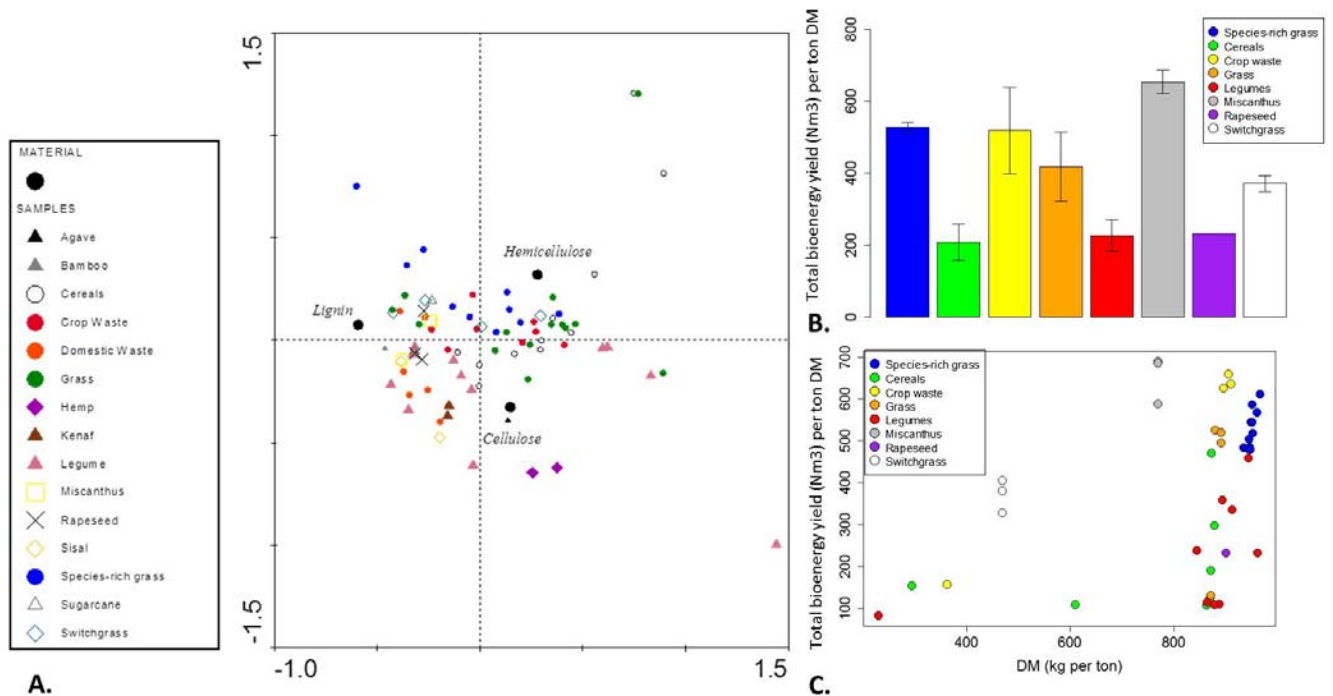

298  
 299 **Figure 2 Comparison of grasslands to other bioenergy feedstocks.** A. Correspondence analysis showing the  
 300 lignocellulosic composition of bioenergy feedstocks. B. Estimated biogas yield of bioenergy feedstocks based on 1  
 301 ton dry matter. Bar plot shows mean  $\pm$  standard error. C. Correlation between dry matter yield and biogas yield. In  
 302 the legends, “species-rich grass” refers to biomass from unimproved and restored grasslands.

303  
 304 Biogas yield varied significantly among bioenergy feedstock types ( $F_{7,35} = 5.33$ ,  $P < 0.001$ ) (**Table 3**;  
 305 **Figure 2B**; **Supplementary Materials Table 3** contains the results for each sample). The average biogas  
 306 yield of species-rich grass was up to three times higher than that of cereals, legumes, grass, and  
 307 rapeseed. There was no significant difference between the biogas yield of biomass from species rich  
 308 grasslands and crop waste ( $t = -1.57$ ,  $P = 0.12$ ), Switchgrass ( $t = -1.53$ ,  $P = 0.13$ ), and Miscanthus ( $t = 1.47$ ,  
 309  $P = 0.15$ ). Despite differences in biogas and methane yield, methane concentrations of all feedstocks

310 were similar (around 50%). Biogas yield was positively correlated with dry matter content ( $r = 0.4$ ,  $t =$   
 311  $2.7$ ,  $df = 40$ ,  $p = 0.01$ ) (**Figure 2C**).

312  
 313  
 314  
 315  
 316  
 317  
 318  
 319

**Table 3 Comparison of lignocellulosic composition and biogas yield of biomass from grasslands managed for conservation to other bioenergy feedstocks.** In the table, averages for each feedstock are represented as the mean  $\pm$  one standard error. Feedstocks marked with 'nd' ('no data') indicate no DM content was available preventing the calculation of biogas yield.

| Feedstock                                               | Cellulose (% DM) | Hemi-cellulose (%DM) | Lignin (%DM)   | DM (kg/t wet weight) | Biogas yield (Nm <sup>3</sup> / t DM) | Methane yield (Nm <sup>3</sup> / t DM) |
|---------------------------------------------------------|------------------|----------------------|----------------|----------------------|---------------------------------------|----------------------------------------|
| <b>Biomass from grasslands managed for conservation</b> |                  |                      |                |                      |                                       |                                        |
| Agave                                                   | 23.4 $\pm$ 3.1   | 23.5 $\pm$ 1.6       | 11.2 $\pm$ 1.8 | 949.9 $\pm$ 48.2     | 527.2 $\pm$ 39                        | 268.5 $\pm$ 20                         |
| Bamboo                                                  | 55.8 $\pm$ 10.6  | 15.3 $\pm$ 5.5       | 6.8 $\pm$ 6.1  | nd                   | nd                                    | nd                                     |
| Cereals                                                 | 39.5 $\pm$ 10.6  | 17.6 $\pm$ 5.55      | 25.2 $\pm$ 6.1 | nd                   | nd                                    | nd                                     |
| Crop Waste                                              | 24.9 $\pm$ 4.2   | 18 $\pm$ 2.2         | 4.9 $\pm$ 2.4  | 679 $\pm$ 104.2      | 207.3 $\pm$ 62.6                      | 108.6 $\pm$ 32.6                       |
| Domestic Waste                                          | 38.2 $\pm$ 4.7   | 26.6 $\pm$ 2.4       | 9.8 $\pm$ 2.7  | 775.6 $\pm$ 77.3     | 518.9 $\pm$ 75.6                      | 266.7 $\pm$ 38.7                       |
| Grass                                                   | 38.8 $\pm$ 5.1   | 15.8 $\pm$ 2.6       | 16 $\pm$ 2.7   | nd                   | nd                                    | nd                                     |
| Hemp                                                    | 20.6 $\pm$ 4.0   | 22.9 $\pm$ 2.1       | 8.9 $\pm$ 2.5  | 880.8 $\pm$ 86.3     | 417.7 $\pm$ 75.6                      | 216 $\pm$ 38.7                         |
| Kenaf                                                   | 68.5 $\pm$ 7.8   | 12.5 $\pm$ 4         | 4.5 $\pm$ 2.3  | nd                   | nd                                    | nd                                     |
| Legumes                                                 | 53.9 $\pm$ 7.8   | 14 $\pm$ 4           | 12.1 $\pm$ 4.5 | nd                   | nd                                    | nd                                     |
| Miscanthus                                              | 22.7 $\pm$ 4.2   | 10 $\pm$ 2.2         | 7.1 $\pm$ 4.5  | 829.3 $\pm$ 71.9     | 226.3 $\pm$ 58.2                      | 115.2 $\pm$ 29.8                       |
| Rapeseed                                                | 44.6 $\pm$ 6.6   | 25.8 $\pm$ 2.2       | 21.2 $\pm$ 2.4 | 768 $\pm$ 104.2      | 653.9 $\pm$ 84.2                      | 328.2 $\pm$ 42.1                       |
| Sisal                                                   | 42 $\pm$ 6.6     | 22 $\pm$ 3.46        | 19.3 $\pm$ 3.8 | 903.5 $\pm$ 122.9    | 232.3 $\pm$ 135.1                     | 116.1 $\pm$ 69.3                       |
| Sugar Beet                                              | 58.9 $\pm$ 7.8   | 15.3 $\pm$ 3.4       | 17.9 $\pm$ 4.5 | nd                   | nd                                    | nd                                     |
| Switchgrass                                             | 34.8 $\pm$ 7.8   | 23 $\pm$ 4           | 17.7 $\pm$ 4.5 | nd                   | nd                                    | nd                                     |
|                                                         | 37.1 $\pm$ 5.9   | 29.17 $\pm$ 4.1      | 15.7 $\pm$ 3.9 | 470 $\pm$ 104.2      | 370.8 $\pm$ 84.3                      | 189 $\pm$ 43.2                         |

320  
 321

### 322 *3.4 Estimated bioenergy yields of grasslands managed for biodiversity conservation*

323

324 The area, average field size, and total biomass yield varied significantly among SSSIs, fields managed  
 325 under agroenvironmental schemes, and Miscanthus ( $F_{20, 7585} = 45.49$ ,  $P < 0.001$ ) (**Figure 3A**;  
 326 **Supplementary Materials Table 4**). In Oxfordshire, 107 SSSI grasslands occupy 2,201.53 ha<sup>2</sup>. The  
 327 average site size is 20.57  $\pm$  0.06 ha<sup>2</sup>. Using the minimum estimate of 8 tDM per ha, the minimum

328 potential biomass yield from these areas would be 17,612.17 tDM while using the maximum estimate of  
329 10 tDM ha gives a total of 22,015.34 tDM. Areas managed under agroenvironmental schemes cover a  
330 total of 30,331.13 ha<sup>2</sup>. This consists of 7,479 grasslands managed under 19 different agro-  
331 environmental schemes (Entry and High Level Stewardship). Most sites are managed under schemes  
332 that maintain permanent grassland under article 13 (3,187 sites) and permanent grasslands with low  
333 (1,471 sites) and very low inputs (1,330 sites) not located in Severely Disadvantaged Areas (SDA) or  
334 above the Moorland Line (ML).<sup>2</sup> Overall, the average field size is  $8.31 \pm 0.92$  ha<sup>2</sup> and the largest fields  
335 are managed to protect the habitat of breeding wetland birds. Using the minimum estimate of 8 tDM  
336 per ha, the minimum potential biomass yield from these areas would be 242,649 tDM while using the  
337 maximum estimate of 10 tDM ha gives a total of 303,311.3 tDM. In comparison, the average area used  
338 for bioenergy crop production under Defra's bioenergy crops scheme from 2003-2013 was 174.18 ha<sup>2</sup>,  
339 with 119.06 ha<sup>2</sup> planted with Miscanthus. Miscanthus fields were  $5.95 \pm 1.58$  ha<sup>2</sup> on average. Using the  
340 minimum estimate of 10 tDM per ha, the minimum potential biomass yield from these areas would be  
341 1,190.6 tDM while using the maximum estimate of 14 tDM ha gives a total of 1,664.84 tDM.

342  
343 The average biogas yield per field varied significantly among SSSIs, Miscanthus, and the fields managed  
344 under the 19 different agroenvironmental schemes ( $F_{20, 17585} = 45.54, P < 0.001$ ) (**Figure 3B**). SSSIs had  
345 the highest yield ( $104,867 \pm 3,191\text{Nm}^3$ ), followed by wetlands maintained for breeding waders ( $73,415 \pm$   
346  $6,174\text{Nm}^3$ ), and Miscanthus ( $48,283 \pm 8,041\text{Nm}^3$ ). Permanent grasslands managed with low and very  
347 low inputs ( $18,723 \pm 3,305\text{Nm}^3$  and  $15,605 \pm 3,317\text{Nm}^3$  respectively) and newly created heathlands had  
348 the lowest average yields per field ( $3,568 \pm 33,161\text{Nm}^3$ ). In order to produce yields competitive to

---

<sup>2</sup>SDA and ML refer to areas where farming is challenging due to rough terrain.



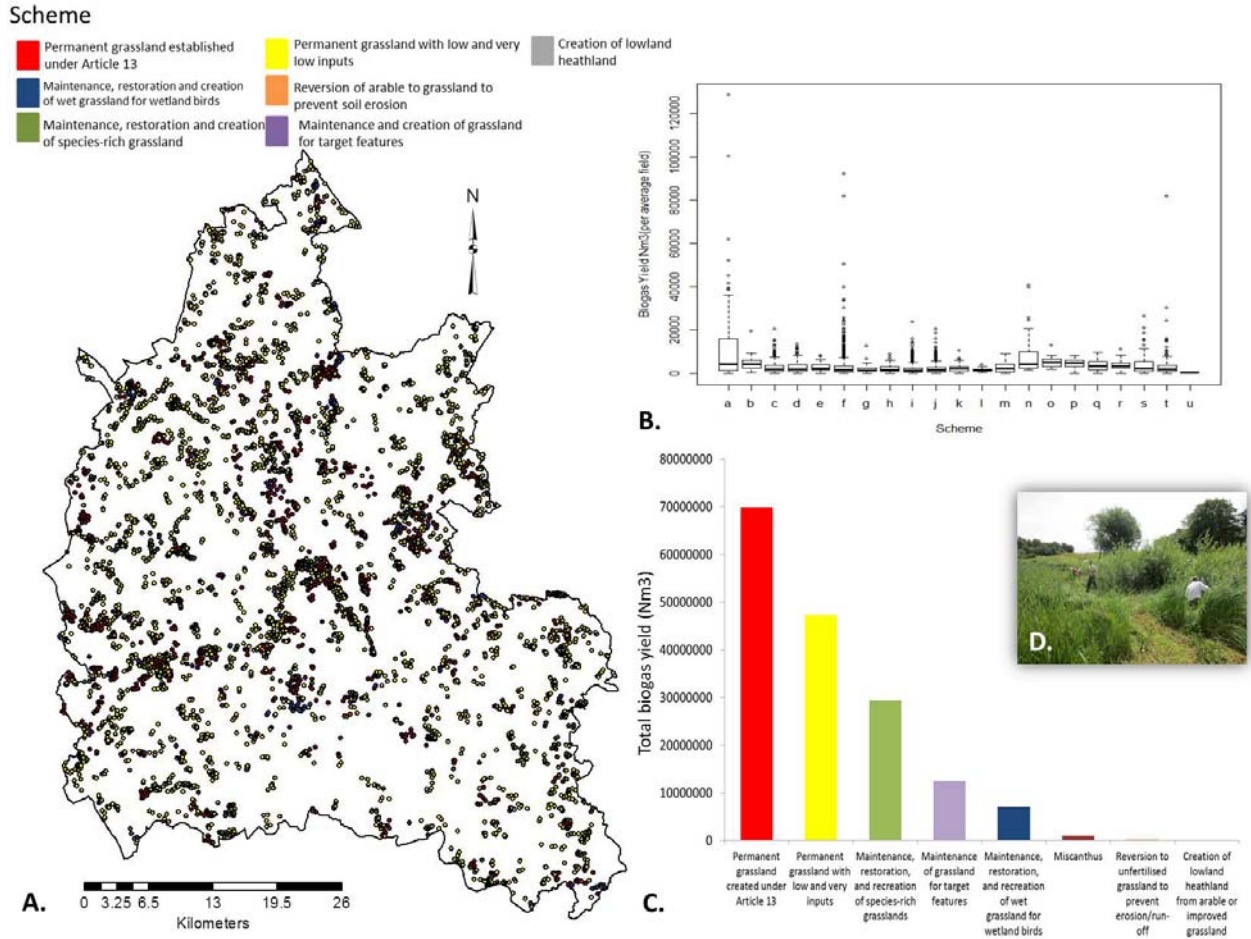

349  
 350 **Figure 3 Regional level analysis of grassland bioenergy potential.** A. Distribution of grasslands managed under  
 351 current agro-environmental schemes in Oxfordshire, England. B. Boxplot showing the average biogas yield per field  
 352 according to scheme. In the diagram, a = SSSIs, b = Miscanthus, f = permanent grassland (unpaid under Article 13),  
 353 n = maintenance of wet grassland for breeding waders, and o = restoration of wet grassland for breeding waders.  
 354 The rest of the schemes can be found in Supplementary Materials Table 4. C. Total estimated biogas yield of land  
 355 managed under each scheme. D. Example grassland managed for conservation in Oxfordshire. Volunteers typically  
 356 cut and burn the harvested biomass each summer.

357

358 Miscanthus fields producing on average 8,110.72 Nm<sup>3</sup>/ha, grasslands would need to be at least 9.5 ha in  
 359 size. This would include roughly 43% (46) of grassland SSSIs in the county and 8% (616) of grasslands  
 360 under agro-environmental schemes. At the scheme level, permanent grasslands maintained under  
 361 Article 13 (69,879,544 Nm<sup>3</sup>), permanent grasslands with low inputs (outside SDA and ML) (24,598,946  
 362 Nm<sup>3</sup>), permanent grasslands with very low inputs (outside SDA and ML) (20,756,514 Nm<sup>3</sup>), SSSIs  
 363 (11,223,459 Nm<sup>3</sup>), and maintained species-rich, semi-natural grasslands (9,490,812 Nm<sup>3</sup>) had the highest

364 total estimated biogas yield. Miscanthus fields produced 965,209 Nm<sup>3</sup> in total. The schemes with the  
365 lowest potential total biogas yield were unfertilized grasslands created to prevent erosion (184,619  
366 Nm<sup>3</sup>), permanent grasslands managed with low inputs (128,892 Nm<sup>3</sup>) and newly created heathlands  
367 (3,379 Nm<sup>3</sup>) (Figure 3C).

368  
369  
370

#### 371 4. Discussion

372

373 The suitability of grassland biomass as a bioenergy feedstock is highly debated. Here, I show how  
374 vegetation species richness and species composition positively impact grassland biogas yield. I  
375 demonstrate that lignocellulosic composition and biogas yield of grasslands managed for conservation  
376 are comparable to other bioenergy feedstocks. Finally, my regional estimation of the potential  
377 bioenergy yields of grasslands managed for conservation illustrates that they could potentially yield  
378 more biogas compared to fields sown with Miscanthus fields due to larger average field sizes and the  
379 amount of land currently used for grassland conservation.

380

##### 381 4.1 Vegetation species-composition affects grassland bioenergy yield

382

383 Species-composition plays a strong role in the lignocellulosic composition and potential biogas yields of  
384 grasslands. The significantly higher estimated biogas yields of unimproved and conservation grasslands  
385 compared to improved grasslands may be due to the presence of tall species with high levels of lignin  
386 and hemicellulose. For example, biomass samples with the highest potential biogas yield contained  
387 reeds (*P. australis*), Orchard grass (*D. glomerata*), Yellow Oat-Grass (*T. flavescens*), and Giant Fescue (*F.*  
388 *gigantea*). All of these plants are taller than 100 cm. To date, there is little quantitative data on the  
389 biogas yields of specific grassland species. However, *P. australis* has been shown to produce high levels

390 of biogas during anaerobic digestion (Lin 2012; Melts et al. 2013, 2014; Prochnow et al. 2009). In the  
391 US, bioethanol yields of prairies are also found to be higher on grasslands dominated by tall C<sub>4</sub> grasses  
392 (*Panicum virgatum* L, *Andropogon gerardii* Vitman, and *Sorghastrum nutans* (L.) Nash) than grasslands  
393 with a higher species-richness (Adler et al. 2009). These results challenge current research on the effect  
394 of biodiversity on the bioenergy yields of grasslands. Increasing species-richness may not directly result  
395 in increased bioenergy yields. Rather, selecting the right species may have a greater effect. To balance  
396 the needs of conservation while optimizing bioenergy potential, grasslands under restoration could be  
397 sown with species amenable to both goals.

398

399 *4.2 Biomass from grasslands managed for conservation is comparable to current bioenergy feedstocks*

400

401 Despite claims that grassland biomass is high in lignin (Frigon and Giuiot 2010), this study presents the  
402 first comparative analysis showing that grasslands managed for conservation produce biomass similar in  
403 lignocellulosic composition to other bioenergy feedstocks. This suggests that there should be no  
404 technological barrier to producing biogas from grasslands. The estimated biogas yield of biomass from  
405 grasslands managed for conservation was also comparable to other feedstocks such as Switchgrass and  
406 Miscanthus. All three feedstocks had a high DM content, which may explain these results. Although  
407 these results are encouraging, they are based on biomass harvested in July and on theoretical  
408 calculation of bioenergy potential based on chemical composition and further research using batch scale  
409 digesters is needed to confirm these claims. However, these results do agree with other studies in  
410 Europe and the US that report high biogas/ethanol yields from grasslands. For example, Steubing et al.  
411 (2010) found that biogas yields from meadows and pastures (17.4 GJ/t DM) were slightly higher than the  
412 yield from forest wood (15.8 GJ/t DM), waste paper and cardboard (17 GJ/t DM), and current bioenergy  
413 crops (17.3 GJ/t DM). Tilman et al. (2006) also found that low-input high diversity grasslands in the US

414 produced three times more bioenergy than Switchgrass (based on estimating ethanol output at 0.255 L  
415 per kg<sup>-1</sup> dry matter). In order to establish the true bioenergy yield of grasslands managed for  
416 conservation, a larger program of research sampling a greater number of grasslands and preparing  
417 biomass with currently available pretreatments to break down lignin (e.g. those used for Miscanthus)  
418 should be conducted.

419

#### 420 *4.3 Integrating agriculture, biodiversity conservation and bioenergy production*

421

422 Globally, the area of grassland managed for conservation is increasing rapidly as traditional pastoral  
423 systems decline in the UK, Europe, and other parts of the world (Hodgson et al. 2005; Hoekstra et al.  
424 2005). Turning the unused biomass from these areas into bioenergy would give these landscapes a new  
425 purpose while also promoting the conservation of these habitats. In Oxfordshire, SSSIs, wetlands  
426 maintained for breeding birds, and permanent grasslands cover large areas and had the highest  
427 estimated biogas yields by field and in total ha<sup>2</sup>. Similar patterns of grassland cover are seen across  
428 England (French, *unpublished data*). In many cases, these grasslands are not used for livestock  
429 production (for hay or grazing) and produce excess biomass that is usually burned in the late summer or  
430 autumn. Turning this biomass into bioenergy could provide farmers with an additional source of income.  
431 For example, in Oxfordshire (and in Europe) permanent grasslands protected under Article 13 cover a  
432 large geographic area but farmers do not receive payments for maintaining these landscapes. Farmers  
433 could produce electricity and heating by processing grassland biomass in farm-scale anaerobic digesters  
434 (which could be used or sold). Grass is an attractive bioenergy crop: farmers are familiar with managing  
435 grasslands, do not need specialized machinery to harvest hay, and harvesting grass for bioenergy fits  
436 into current arable time cycles. However, if grasslands currently managed for conservation were used  
437 for bioenergy production, specific monitoring programs would need to be put in place to ensure local

438 biodiversity (e.g. specific rare species) or landscape quality does not decline. Some habitats (e.g.  
439 wetlands maintained for breeding waders) require specific management activities, specifically, late  
440 biomass cuts. This should not affect bioenergy yield however, particularly as increased DM content  
441 appears to correlate with increased bioenergy yields (Heinsoo et al. 2011).

442

443 If bioenergy production from grasslands is carried out on a large scale, it could contribute to national  
444 economic growth and reduced greenhouse gas emissions, as seen in Sweden and Germany (Jones and  
445 Salter 2013; Parmlind 2014). A lifecycle analysis, taking into the costs associated with harvesting and  
446 processing grassland biomass for biogas production, would be useful to both farmers considering biogas  
447 production and policy makers. However, the county-level analysis of potential grassland bioenergy  
448 yields presented here should be read with caution. First, not all of these grasslands might be suitable for  
449 bioenergy production due to terrain (e.g. sloping hills) or prior use (e.g. traditional grazing) (Ciello 2009;  
450 Stuebing et al. 2010). To avoid potential land-use conflicts, land traditionally used for grazing could be  
451 set aside and protected from any potential enrollment in national bioenergy schemes. Second, the  
452 variation in biomass among grasslands is currently unknown. I have based my estimates at 8 tDM per ha  
453 which is considered 'average' for the region. However, chalk grasslands (which are low in soil nitrogen)  
454 produce shorter and less dense biomass than more fertile fen meadows. A citizen science initiative,  
455 where farmers and conservation workers measure sward height and biomass, would lead to a more  
456 accurate picture of the potential bioenergy yield of grasslands managed for conservation.

457

## 458 **5. Conclusion**

459

460 Finding sustainable sources of energy to replace fossil fuels will be one of the greatest challenges of the  
461 21<sup>st</sup> century. Producing bioenergy from grasslands is a potential practical solution that has been

462 underexplored to date. Biomass from grasslands managed for conservation is comparable in  
463 lignocellulosic composition to other bioenergy feedstocks and even contains less lignin than one of the  
464 most popular and lauded bioenergy crops, Miscanthus. In addition, the estimated biogas yield of  
465 grassland biomass exceeds that of current substrates used for anaerobic digestion. On a regional level,  
466 grasslands currently managed for conservation are on average up to four times larger than fields sown  
467 with bioenergy crops and occupy dramatically more ha<sup>2</sup>. Giving a 'new purpose' to these landscapes  
468 could reduce biomass waste, boost farmer interest in conservation, and provide farmers with a new  
469 source of income. However, the full potential of grassland biomass as a bioenergy crop can only be  
470 realized with changes to current agroenvironmental policies. Current policies could be adapted to  
471 increase monetary incentives for farmers to harvest grassland biomass for bioenergy in the form of a  
472 cash payment per grassland ha<sup>2</sup> used for bioenergy production. Policy makers could also help facilitate  
473 the use of grasslands for bioenergy production by providing farmers with access to resources (e.g.  
474 training in AD technology, different methods for processing biomass for digestion to optimize biogas  
475 yield, etc.). By taking these steps, using grasslands for bioenergy production could contribute to  
476 reducing reliance on fossil fuels, decreasing cultivation of primary bioenergy crops, and achieving  
477 national goals of reducing carbon emissions by 2050, all while conserving native biodiversity.

478

#### 479 **Acknowledgements**

480 The author wishes to thank Natural England, FAI Farms, Earth Trust, Berkshire, Buckinghamshire, and  
481 Oxfordshire Wildlife Trust (BBOWT) and local farmers and graziers for providing access to their  
482 grasslands and L. Turnbull for comments on earlier versions of this paper.

483

#### 484 **Funding**

485 This research was carried out with funding from the Marshall Aid Commemoration Commission, Trinity  
486 College, Oxford, and the Biosocial Society.

487

488 *Conflict of interest.* None declared.

489

## 490 **References**

491

492 Adler, P.R. et al., 2009. Plant species composition and biofuel yields of conservation grasslands.

493 *Ecological Applications*, 19(8), pp.2202–2209.

494 Amon, T. et al., 2006. Methane production through anaerobic digestion of various energy crops grown in  
495 sustainable crop rotations. *Bioresource Technology*, 98(17), pp.3204–3212.

496 Anon, Miscanthus (*Miscanthus x giganteus*) for Biofuel Production - eXtension. Available at:

497 [http://www.extension.org/pages/26625/miscanthus-miscanthus-x-giganteus-for-biofuel-](http://www.extension.org/pages/26625/miscanthus-miscanthus-x-giganteus-for-biofuel-production)  
498 [production](http://www.extension.org/pages/26625/miscanthus-miscanthus-x-giganteus-for-biofuel-production) [Accessed October 30, 2015].

499 Bauen, A.W. et al., 2010. Modelling supply and demand of bioenergy from short rotation coppice and  
500 Miscanthus in the UK. *Bioresource Technology*, 101(21), pp.8132–8143.

501 Biomass Energy Center (BEC), 2008, Miscanthus. *Sources of Biomass*. Available at:

502 <http://www.biomassenergycentre.org.uk/>.

503 Burns, C., Higson, A. & Hodgson, E., 2016. Five recommendations to kick-start bioeconomy innovation in  
504 the UK. *Biofuels, Bioproducts And Biorefining*, 10(1), pp.12–16.

505 Butt, N. et al., 2013. Biodiversity Risks from Fossil Fuel Extraction. *Science*, 342(6157), pp.425–426.

506 Christian, D.G., Riche, A.B. & Yates, N.E., 2008. Growth, yield and mineral content of *Miscanthus x*  
507 *giganteus* grown as a biofuel for 14 successive harvests. *Industrial Crops and Products*, 28(3),  
508 pp.320–327.

- 509 Clifton-Brown, J.C. et al., 2001. Performance of 15 Genotypes at Five Sites in Europe. *Agronomy*  
510 *Journal*, 93(5), p.1013.
- 511 Crawley, M.J., 2011. *Statistics: an introduction using R.*, Hoboken: John Wiley & Sons.
- 512 Crutzen, P.J. et al., 2008. N<sub>2</sub>O release from agro-biofuel production negates global warming reduction  
513 by replacing fossil fuels. *Atmos. Chem. Phys.*, 8(2), pp.389–395.
- 514 DeHaan, L., S. Weisberg, D. Tilman, and D. Fornara. 2009. Agricultural and biofuel implications of a  
515 species diversity experiment with native perennial grassland plants. *Agriculture, Ecosystems,*  
516 *and the Environment* 137: 33-38.
- 517 Energy Research Centre of the Netherlands, Phyllis2, database for biomass and waste. Available at:  
518 <https://www.ecn.nl/phyllis2>.
- 519 European Commission (EC), 2005. *New perspectives on the knowledge-based bio-economy:*  
520 *conference report*, Brussels: European Commission.
- 521 Fitter, R., et al., 1984. *Collins guide to the grasses, sedges, rushes, and ferns of Britain and Northern*  
522 *Europe*, London: Collins.
- 523 Fletcher, R.J. et al., 2011. Biodiversity conservation in the era of biofuels: risks and opportunities.  
524 *Frontiers in Ecology and the Environment*, 9(3), pp.161–168.
- 525 Frigon, J.-C. & Guiot, S.R., 2010. Biomethane production from starch and lignocellulosic crops: a  
526 comparative review. *Biofuels, Bioproducts and Biorefining*, 4(4), pp.447–458.
- 527 Heinsoo, K. et al., 2011. Reed canary grass yield and fuel quality in Estonian farmers' fields. *Biomass*  
528 *and Bioenergy*, 35(1), pp.617–625.
- 529 Herrmann, C., A. Prochnow, M. Heiermann, and C Idler. 2013. Biomass from landscape management of  
530 grassland used for biogas production: Effects of harvest date and silage additives on feedstock  
531 quality and methane yield. *Grass and Forage Science*. 69. 10.1111/gfs.12086.
- 532 Himken, M. et al., 1997. Cultivation of *Miscanthus* under West European conditions: Seasonal changes in



- 533           dry matter production, nutrient uptake and remobilization. *Plant and Soil*, 189(1), pp.117–126.
- 534 Himmel, M.E. et al., 2007. Biomass recalcitrance: Engineering plants and enzymes for biofuels  
535           production. *Science*, 315(5813), pp.804–807.
- 536 Hodgson, J.G. et al., 2005. How much will it cost to save grassland diversity? *Biological Conservation*,  
537           122(2), pp.263–273.
- 538 Hoekstra, J.M. et al., 2005. Confronting a biome crisis: global disparities of habitat loss and protection.  
539           *Ecology Letters*, 8(1), pp.23–29.
- 540 Holzschuh, A. et al., 2011. Expansion of mass-flowering crops leads to transient pollinator dilution and  
541           reduced wild plant pollination. *Proceedings of the Royal Society B-Biological Sciences*, 278(1723),  
542           pp.3444–3451.
- 543 Jones, P. & Salter, A., 2013. Modelling the economics of farm-based anaerobic digestion in a UK whole-  
544           farm context. *Energy Policy*, 62, pp.215–225.
- 545 Jones, C.S. & Mayfield, S.P., 2012. Algae biofuels: versatility for the future of bioenergy. *Current Opinion*  
546           *in Biotechnology*, 23(3), pp.346–351.
- 547 Kahle, P. et al., 2001. Cropping of Miscanthus in Central Europe: biomass production and influence on  
548           nutrients and soil organic matter. *European Journal of Agronomy*, 15(3), pp.171–184.
- 549 Kalluri, U.C. et al., 2014. Systems and synthetic biology approaches to alter plant cell walls and reduce  
550           biomass recalcitrance. *Plant Biotechnology Journal*, 12(9), pp.1207–1216.
- 551 Kirschke, S. et al., 2013. Three decades of global methane sources and sinks. *Nature Geoscience*, 6(10),  
552           pp.813–823.
- 553 Lepš, J. & Šmilauer, P., 2003. *Multivariate analysis of ecological data using CANOCO*, Cambridge:  
554           Cambridge University Press.
- 555 Liao, J.C. et al., 2016. Fuelling the future: microbial engineering for the production of sustainable  
556           biofuels. *Nature Reviews Microbiology*, 14(5), pp.288–304.

- 557 Lin, S., 2012. *Wetland biomass - Chemical benefits and problems with biogas usage*, Available at:  
558 <http://www.diva-portal.org/smash/record.jsf?pid=diva2%3A535260&dswid=-7907> [Accessed  
559 October 30, 2015].
- 560 McCormick, K. & Kautto, N., 2013. The Bioeconomy in Europe: An Overview. *Sustainability*, 5(6),  
561 pp.2589–2608.
- 562 Melts, I. et al., 2013. Comparison of two different bioenergy production options from late harvested  
563 biomass of Estonian semi-natural grasslands. *Energy*, 61, pp.6–12.
- 564 Melts, I., Heinsoo, K. & Ivask, M., 2014. Herbage production and chemical characteristics for bioenergy  
565 production by plant functional groups from semi-natural grasslands. *Biomass and Bioenergy*, 67,  
566 pp.160–166.
- 567 Muthangya, M., Mshandete, A.M. & Kivaisi, A.K., 2009. Two-Stage Fungal Pre-Treatment for Improved  
568 Biogas Production from Sisal Leaf Decortication Residues. *International Journal of Molecular*  
569 *Sciences*, 10(11), pp.4805–4815.
- 570 Openshaw, K., 2000. A review of *Jatropha curcas*: an oil plant of unfulfilled promise. *Biomass &*  
571 *Bioenergy*, 19(1), pp.1–15.
- 572 Parmlind, E., 2014. *Energy analysis of farm-based biogas plants in Sweden*. Uppsala: SLU, Dept. of  
573 Energy and Technology. Available at: <http://stud.epsilon.slu.se/6765/>.
- 574 Prochnow, A. et al., 2009. Bioenergy from permanent grassland – A review: 1. Biogas. *Bioresource*  
575 *Technology*, 100(21), pp.4931–4944.
- 576 Richards, B.K. et al., 2001. Methods for kinetic analysis of methane fermentation in high solids biomass  
577 digesters. *Biomass and Bioenergy*, 1(2), pp.65–73.
- 578 Rittmann, B.E., 2001. *Environmental biotechnology: principles and applications*, Boston: McGraw-Hill.
- 579 Rösch, C. et al., 2009. Energy production from grassland – Assessing the sustainability of different  
580 process chains under German conditions. *Biomass and Bioenergy*, 33(4), pp.689–700.

- 581 Russelle, M.P. et al., 2007. Comment on “Carbon-negative biofuels from low-input high-diversity  
582 grassland biomass”. *Science (New York, N.Y.)*, 316(5831), p.1567; author reply 1567.
- 583 Seppälä, M. et al., 2009. Biogas production from boreal herbaceous grasses – Specific methane yield and  
584 methane yield per hectare. *Bioresource Technology*, 100(12), pp.2952–2958.
- 585 Steubing, B. et al., 2010. Bioenergy in Switzerland: Assessing the domestic sustainable biomass  
586 potential. *Renewable and Sustainable Energy Reviews*, 14(8), pp.2256–2265.
- 587 Sun, L., Müller, B. & Schnürer, A., 2013. Biogas production from wheat straw: community structure of  
588 cellulose-degrading bacteria. *Energy, Sustainability and Society*, 3(1), p.15.
- 589 Teghammer, A., 2013. *Biogas Production from Lignocelluloses: Pretreatment, Substrate*  
590 *Characterization, Co-digestion, and Economic Evaluation*. PhD thesis. Göteborg, Sweden:  
591 Doktorsavhandlingar vid Chalmers Tekniska Högskola.
- 592 Tilman, D., Hill, J. & Lehman, C., 2006. Carbon-Negative Biofuels from Low-Input High-Diversity  
593 Grassland Biomass. *Science*, 314(5805), pp.1598–1600.
- 594 Triolo, J.M. et al., 2012. Biochemical methane potential and anaerobic biodegradability of non-  
595 herbaceous and herbaceous phytomass in biogas production. *Bioresource Technology*, 125,  
596 pp.226–232.
- 597 Van Meerbeek, K., S. Ottoy, M. de Andres Garcia, B. Muys, and M. Hermy. 2016. The bioenergy potential  
598 of Natura 2000 – a synergy between climate change mitigation and biodiversity protection.  
599 *Frontiers in Ecology and the Environment*. <https://doi.org/10.1002/fee.1425>
- 600 Verdade, L.M., Piña, C.I. & Rosalino, L.M., 2015. Biofuels and biodiversity: Challenges and  
601 opportunities. *Environmental Development*, 15, pp.64–78.
- 602 Wagner, A.O., Schwarzenauer, T. & Illmer, P., 2013. Improvement of methane generation capacity by  
603 aerobic pre-treatment of organic waste with a cellulolytic *Trichoderma viride* culture. *Journal of*  
604 *Environmental Management*, 129, pp.357–360.
